# Supplementary material for: Electrical manipulation of skyrmions in a chiral magnet
Source: PubMed Central journal article supplement (PMC8948302; doi:10.1038/s41467-022-29217-4), 2022-03-24
Supplement: 41467_2022_29217_MOESM1_ESM.pdf [file 41467_2022_29217_MOESM1_ESM.pdf]

**Title:** Supplementary Movie 1:

**Description:** The procedure of the Co<sub>8</sub>Zn<sub>10</sub>Mn<sub>2</sub> micro-device fabrication for in-situ Lorentz TEM experiments using the FIB-SEM dual-beam system.

**Title:** Supplementary Movie 2:

**Description:** The movie contains the raw images shown in Fig. 1a, in which the skyrmion creation process after applying the current pulses can be found.

**Title:** Supplementary Movie 3:

**Description:** The movie contains the raw images shown in Supplementary Fig. S3, in which the skyrmion creation for both negative and positive currents in the thermal-dominated region can be found.

**Title:** Supplementary Movie 4:

**Description:** The movie contains the raw images shown in Fig. 2a, in which the skyrmion deletion after applying the current pulses can be found.

**Title:** Supplementary Movie 5:

**Description:** The movie contains the raw images shown in Fig. 3a, in which a single skyrmion with  $Q = -1$  is moved using current pulses.

**Title:** Supplementary Movie 6:

The movie contains the raw images shown in Fig. 3b, in which the collective motion of two skyrmion clusters can be found.

**Title:** Supplementary Movie 7:

**Description:** The movie contains the raw images shown in Supplementary Fig. S8, in which the nonzero skyrmion Hall effect is clearly observed in the low current regime.

**Title:** Supplementary Movie 8:

**Description:** The movie contains the raw images shown in Fig. 4, in which the combination of creation, motion and annihilation using current pulses are demonstrated
